# Supplementary material for: Molecular insights into intrinsic transducer-coupling bias in the CXCR4-CXCR7 system
Source: Springer Nature journal article supplement (doi:10.1038/s41467-023-40482-9), 2023-08-09

## Supplementary Information

### Molecular insights into intrinsic transducer-coupling bias in the CXCR4-CXCR7 system

Parishmita Sarma<sup>1</sup>, Carlo Marion C. Carino<sup>2</sup>, Deeksha S<sup>1</sup>, Shubhi Pandey<sup>1</sup>, Hemlata Dwivedi-Agnihotri<sup>1</sup>, Xue Rui<sup>3</sup>, Yubo Cao<sup>4</sup>, Kouki Kawakami<sup>2</sup>, Poonam Kumari<sup>5</sup>, Yu-Chih Chen<sup>6</sup>, Kathryn E. Luker<sup>7</sup>, Prem N. Yadav<sup>5</sup>, Gary D. Luker<sup>7,8</sup>, Stéphane A. Laporte<sup>5,9</sup>, Xin Chen<sup>3</sup>, Asuka Inoue<sup>2</sup>, and Arun K. Shukla<sup>1\*</sup>

- **Supplementary Fig. 1**
- **Supplementary Fig. 2**
- **Supplementary Fig. 3**
- **Supplementary Fig. 4**
- **Supplementary Fig. 5**
- **Supplementary Fig. 6**
- **Supplementary Fig. 7**
- **Supplementary Fig. 8**
- **Supplementary Fig. 9**
- **Supplementary Table 1**
- **Source Data file :Supplementary Fig. 6a**
- **Source Data file :Supplementary Fig. 6c**

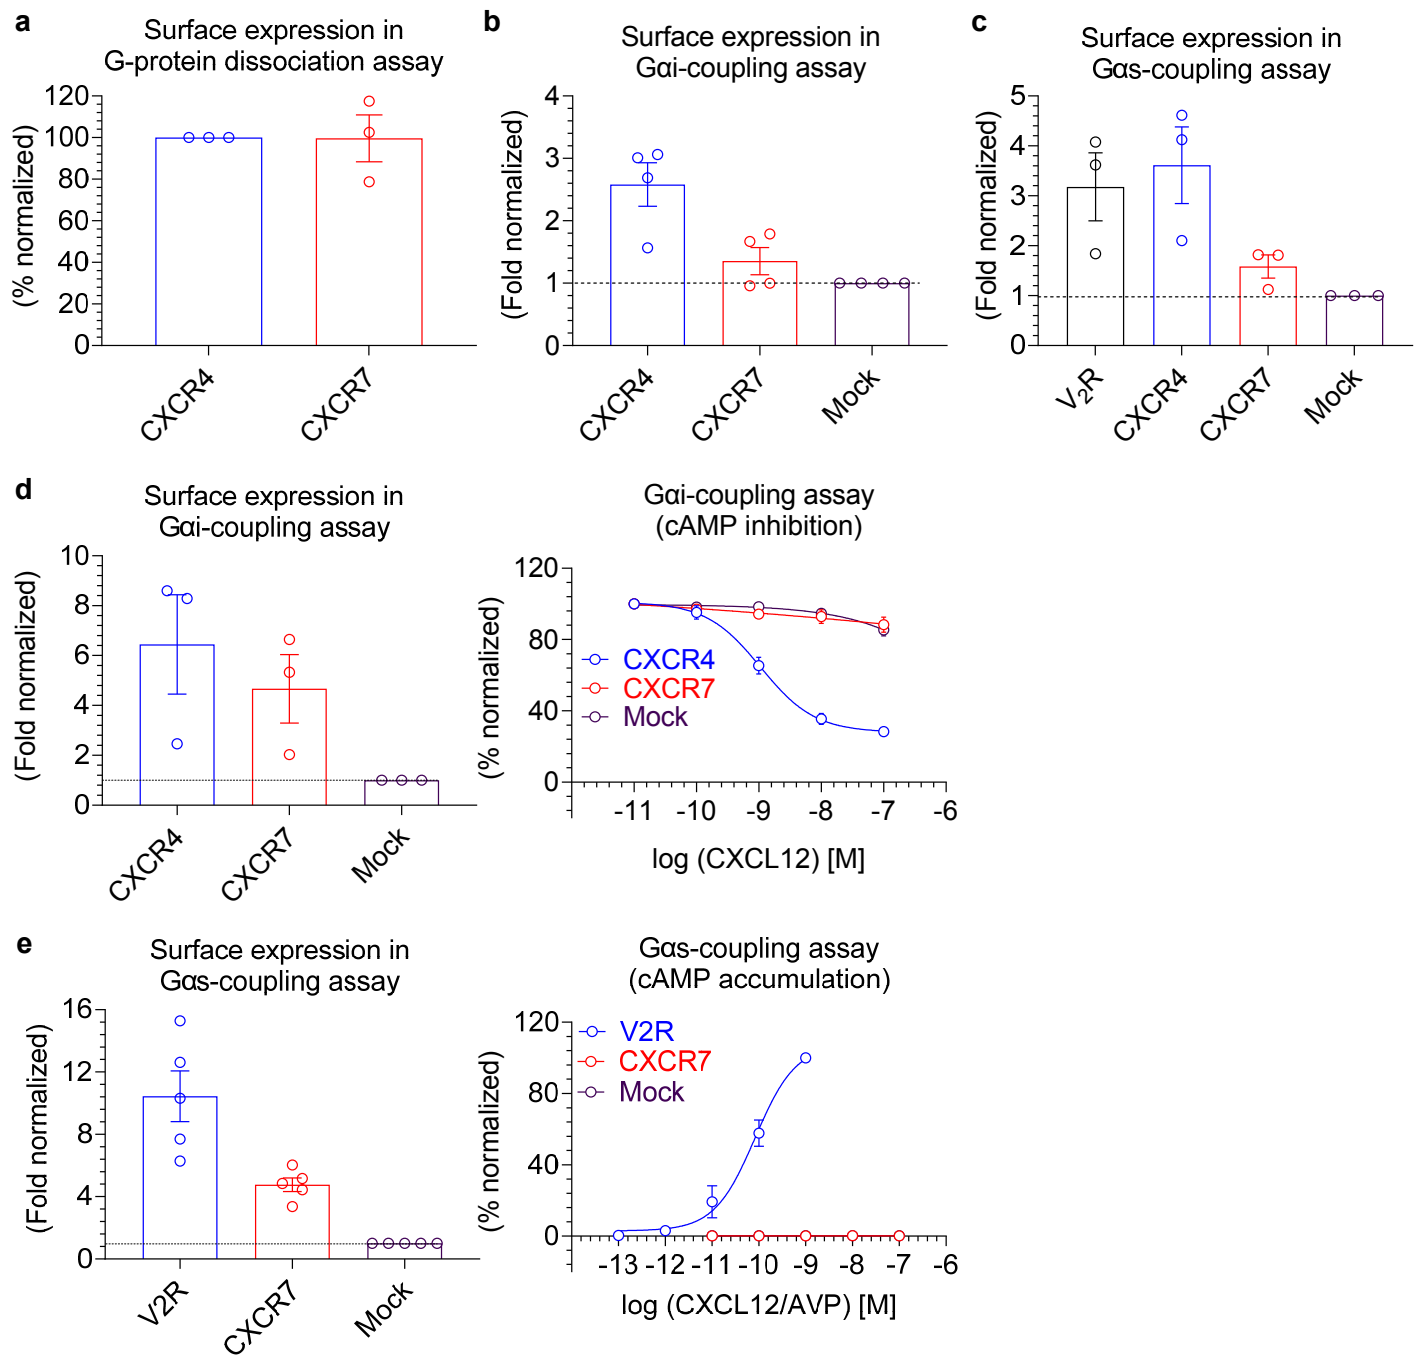

**Supplementary Fig. 1. Surface expression of CXCR4 and CXCR7 in G-protein assays.** **a** Surface expression of CXCR4 and CXCR7 in the G-protein dissociation assay measured using flow cytometry assay (mean±SEM; n=3 independent experiments; normalized with CXCR4 as 100%). **b-c** Surface expression of the indicated receptors in cAMP assay as measured using whole cell ELISA (mean±SEM; n=4 independent experiments for panel **b** and n=3 independent experiments for panel **c**; normalized as fold over mock (pcDNA)-transfection). **d-e** Surface expression (whole cell ELISA) and second messenger response (Gai/s-coupling assay) under higher expression levels of CXCR4 and CXCR7 (mean±SEM; n=3 independent experiments; for panel **d** and n=5-6 independent experiments for panel **e**; for receptor surface expression: n=5 independent experiments, for Gas-coupling assay; n=6) (Gai/s-coupling assay in panel **d** and **e** are normalized with minimal ligand dose for CXCR4 and maximal signal for V<sub>2</sub>R treated as 100%, respectively; surface expression data are normalized as fold over mock (pcDNA)-transfection). Dotted line in the plots **b**, **c**, **d**, and **e** indicates 1 fold. Source data are provided as a source data file.

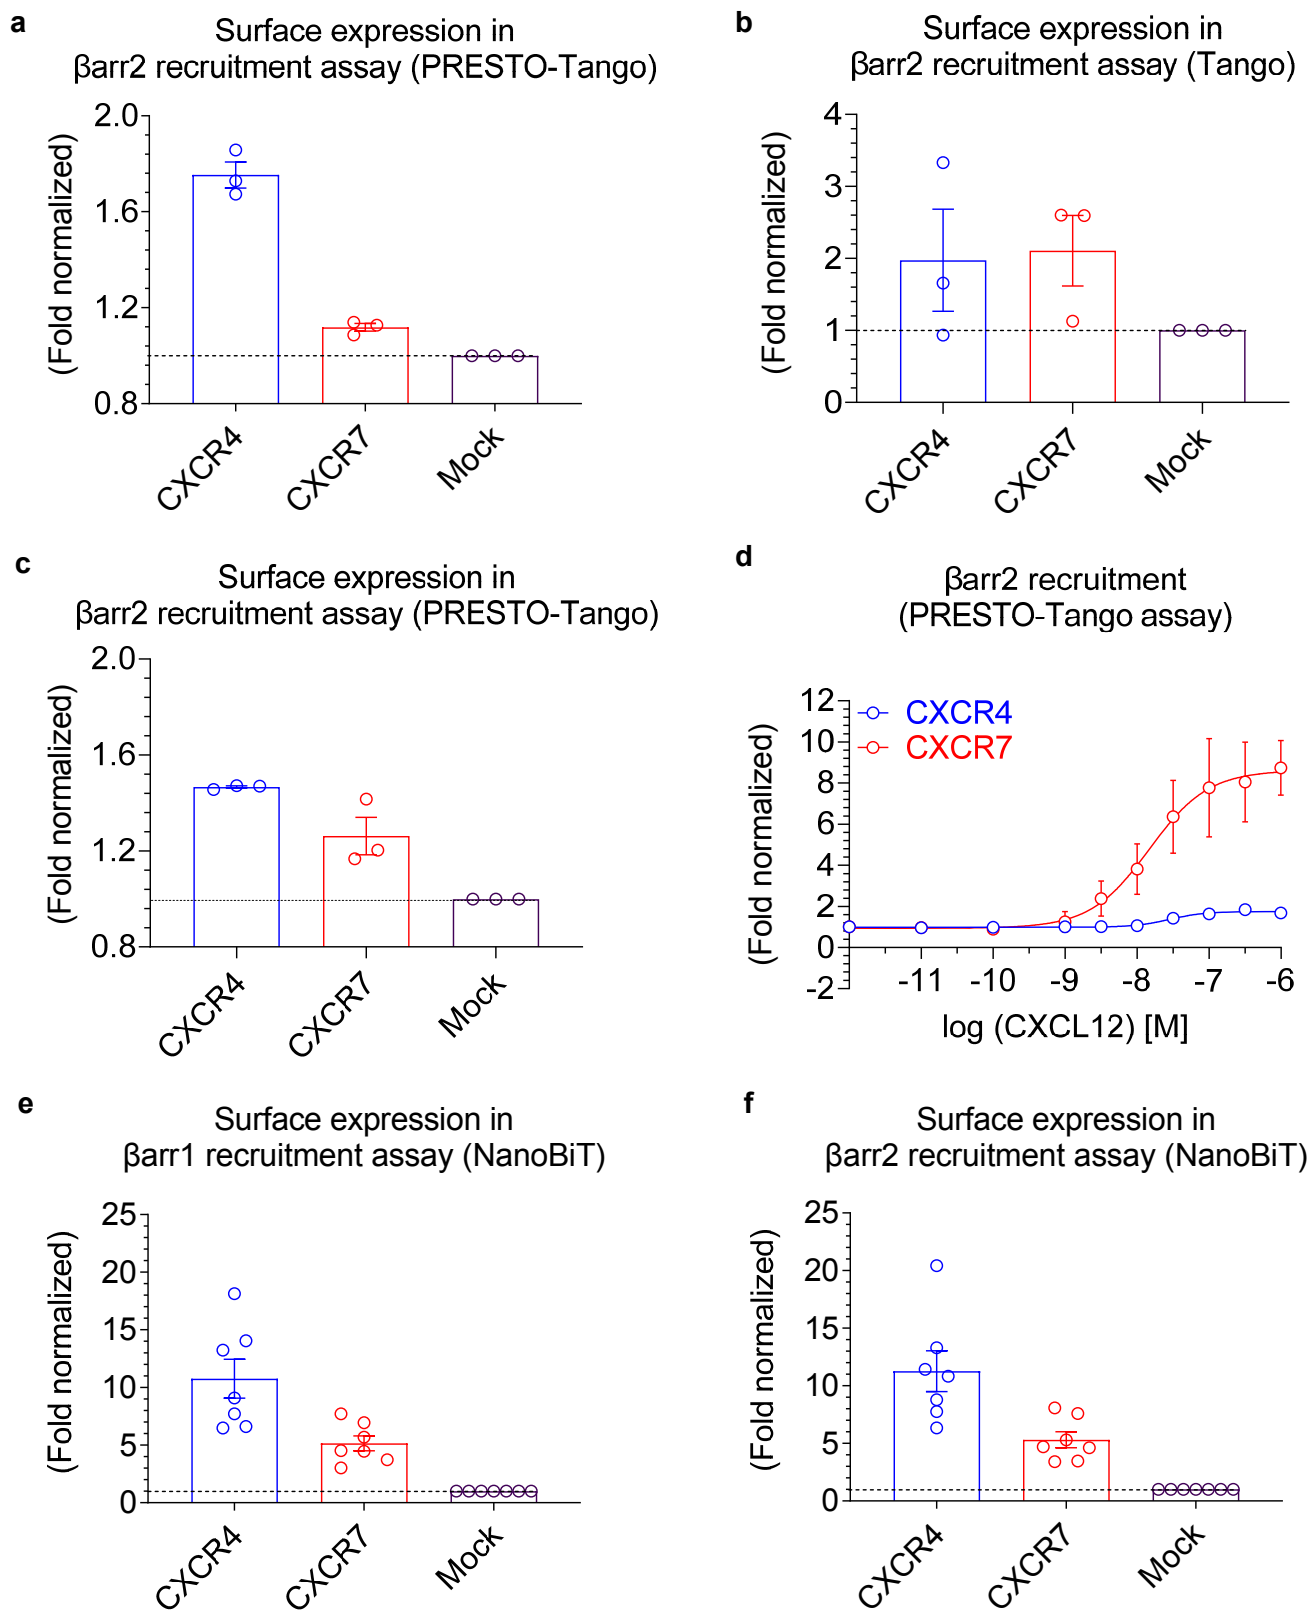

**Supplementary Fig. 2. Surface expression of CXCR4 and CXCR7 in  $\beta$ arr recruitment assays.** a-c, e-f Surface expression of CXCR4 and CXCR7 in  $\beta$ arr recruitment assays measured using whole cell ELISA (mean $\pm$ SEM; n=3 independent experiments for panel a-b; n=7 independent experiments for panel e-f; n=3 independent experiments for panel c; normalized as fold over mock (pcDNA)-transfection). d CXCL12-induced  $\beta$ arr2 recruitment to CXCR4 and CXCR7 in PRESTO-Tango assay (mean $\pm$ SEM; n=3 independent experiments; normalized with the luminescence signal at minimal ligand dose treated as 1). Dotted line in the plots a, b, c, e, and f indicates 1 fold. Source data are provided as a source data file.

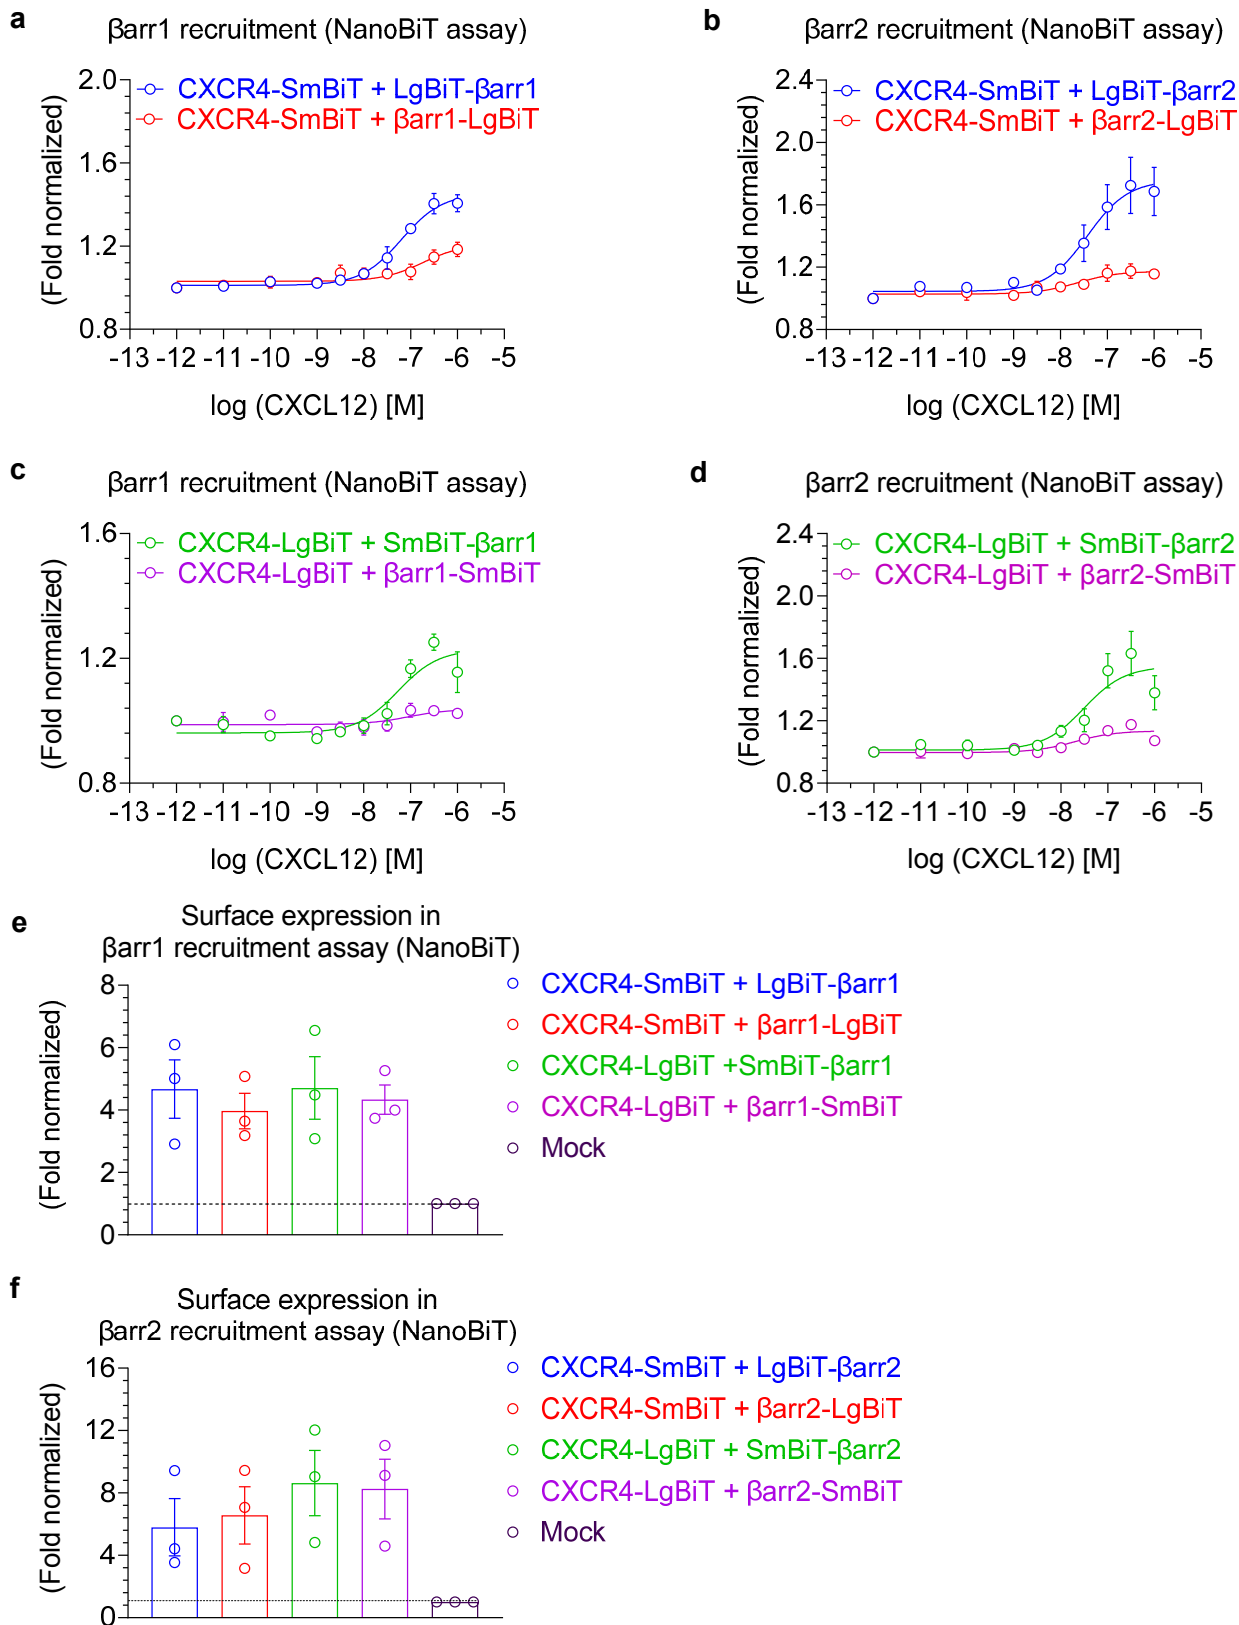

**Supplementary Fig. 3. Optimization of NanoBiT-based  $\beta$ arr recruitment assay for CXCR4.** a-d CXCL12-induced  $\beta$ arr1/2 recruitment to CXCR4 in NanoBiT assay with indicated combination of the constructs (mean $\pm$ SEM; n=3 independent experiments; normalized with the luminescence signal at minimal ligand dose treated as 1). e-f Surface expression of CXCR4 constructs under indicated transfection conditions in the  $\beta$ arr recruitment assay as measured using whole cell ELISA (mean $\pm$ SEM; n=3 independent experiments; normalized as fold over mock (pcDNA)-transfection). Dotted line in the plots e and f indicates 1 fold. Source data are provided as a source data file.

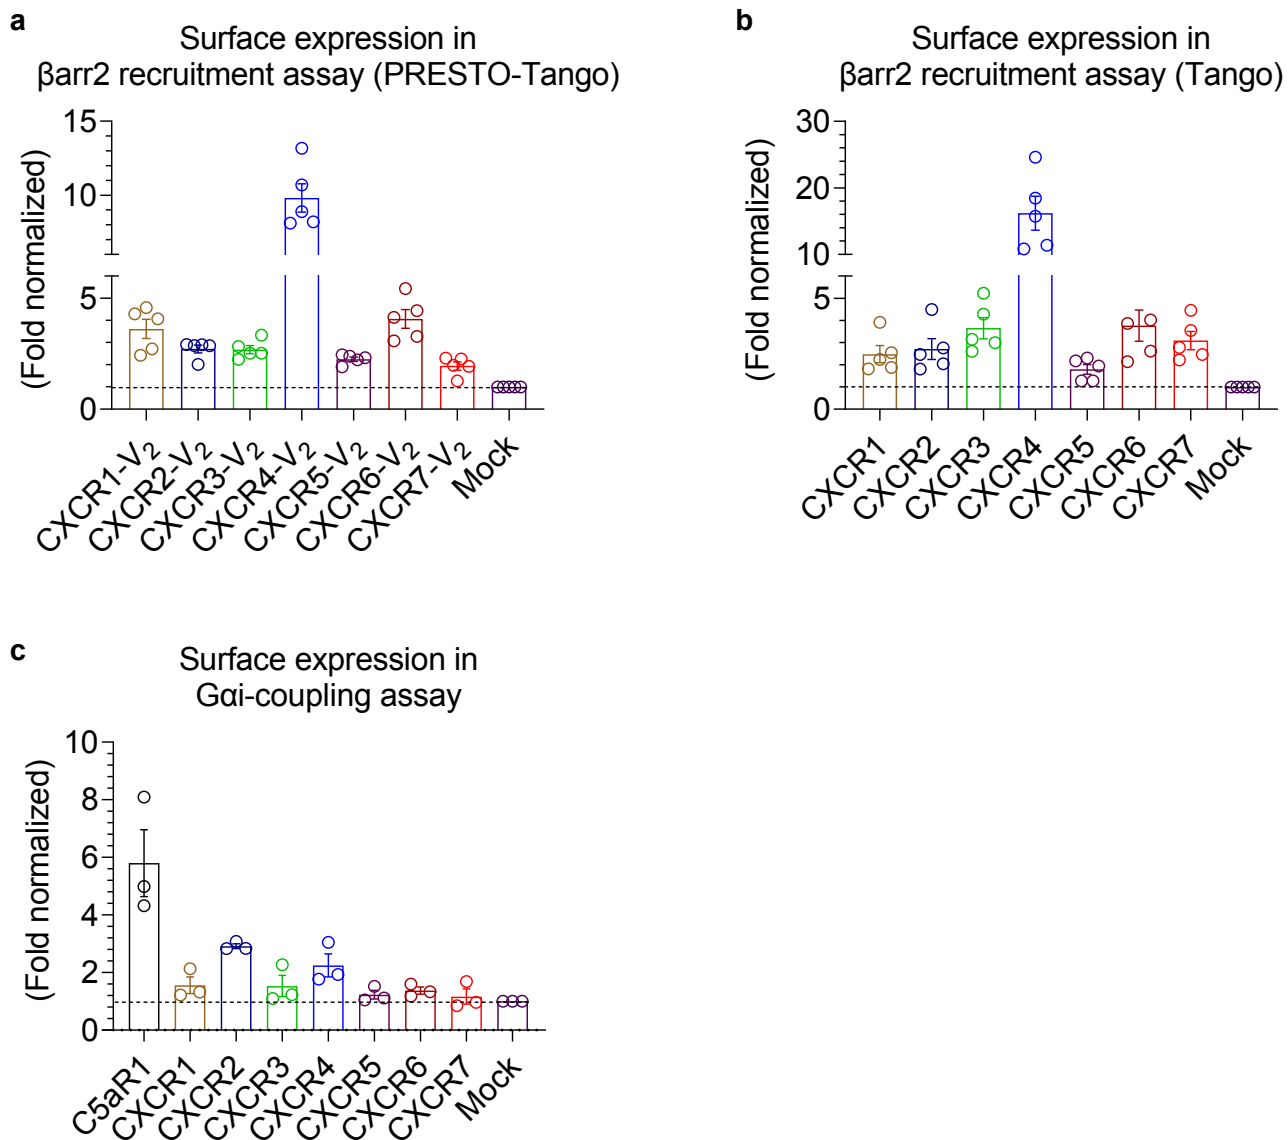

**Supplementary Fig. 4. Surface expression of CXCRs.** **a-b** Surface expression of indicated receptors in  $\beta$ arr recruitment assays measured using whole cell ELISA (mean $\pm$ SEM; n=5 independent experiments for panel a-b; normalized as fold over mock(pcDNA)-transfection). **c** Surface expression of the indicated receptors in cAMP assay as measured using whole cell ELISA (mean $\pm$ SEM; n=3 independent experiments; normalized as fold over mock (pcDNA)-transfection). Dotted line in plots a, b, and c indicates 1 fold. Source data are provided as a source data file.

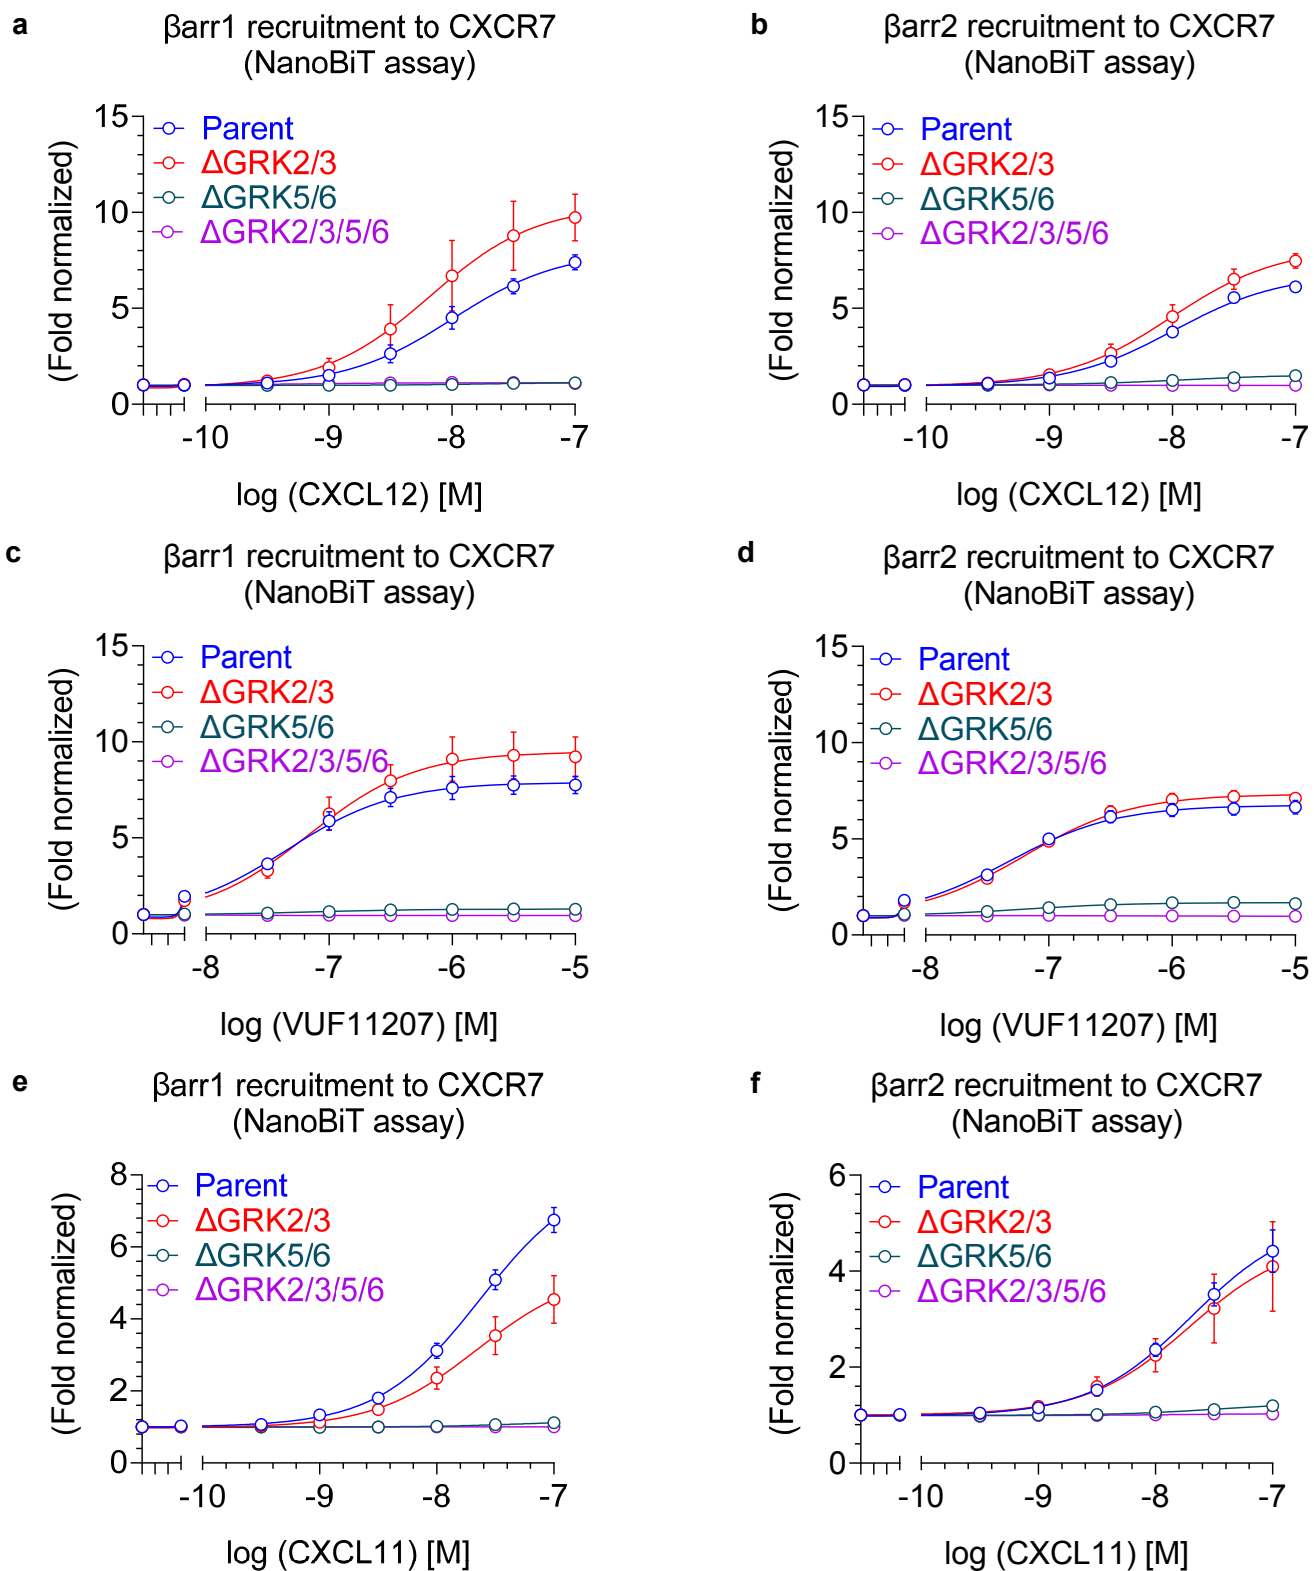

**Supplementary Fig. 5. Effect of PTX treatment on  $\beta$ arr recruitment.** a-f CXCL12-, VUF11207-, and CXCL11-induced  $\beta$ arr1 and 2 recruitment to CXCR7 in GRK knock-out cells using the NanoBiT assay with co-expression of the catalytic subunit of pertussis toxin (PTX) (Receptor-SmBiT+LgBiT- $\beta$ arr1/2), respectively (mean $\pm$ SEM; n=4-5 independent experiments; i.e., for CXCL12- and VUF11207-induced  $\beta$ arr1 recruitment: Parent, n=4;  $\Delta$ GRK2/3, n=4;  $\Delta$ GRK5/6, n=5;  $\Delta$ GRK2/3/5/6, n=4; for CXCL12-induced  $\beta$ arr2 recruitment: Parent, n=5;  $\Delta$ GRK2/3, n=4;  $\Delta$ GRK5/6, n=4;  $\Delta$ GRK2/3/5/6, n=4; for VUF11207-induced  $\beta$ arr2 recruitment: Parent, n=5;  $\Delta$ GRK2/3, n=4;  $\Delta$ GRK5/6, n=5;  $\Delta$ GRK2/3/5/6, n=4; for CXCL11-induced  $\beta$ arr1 and  $\beta$ arr2 recruitment: Parent,  $\Delta$ GRK2/3,  $\Delta$ GRK5/6,  $\Delta$ GRK2/3/5/6, n=4; normalized as fold response with respect to the unstimulated condition treated as 1). Source data are provided as a source data file.

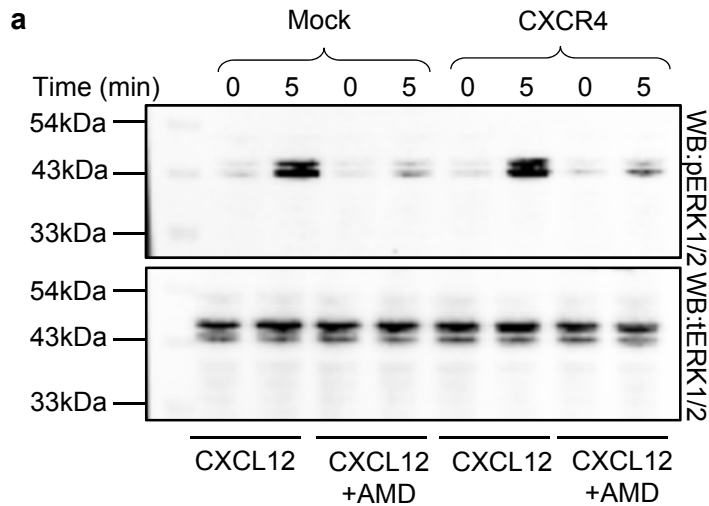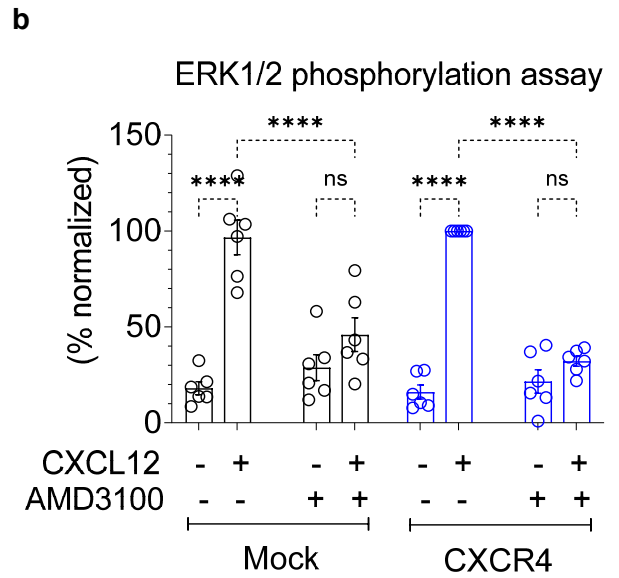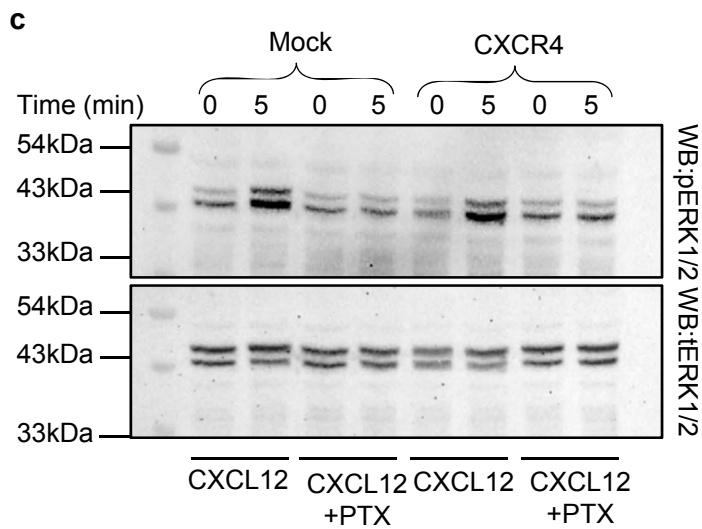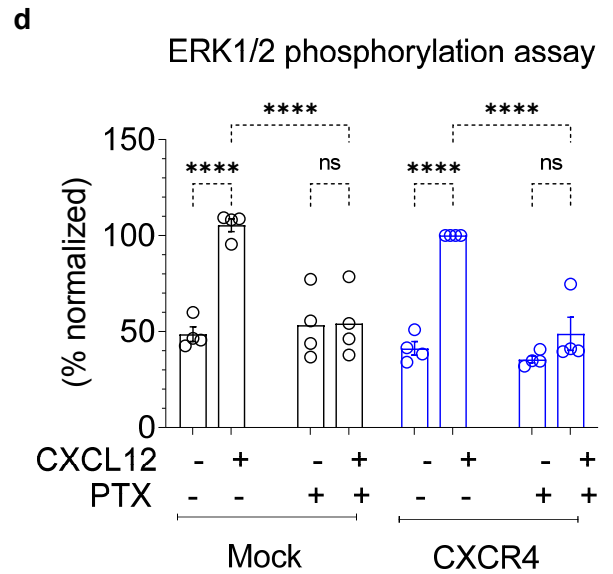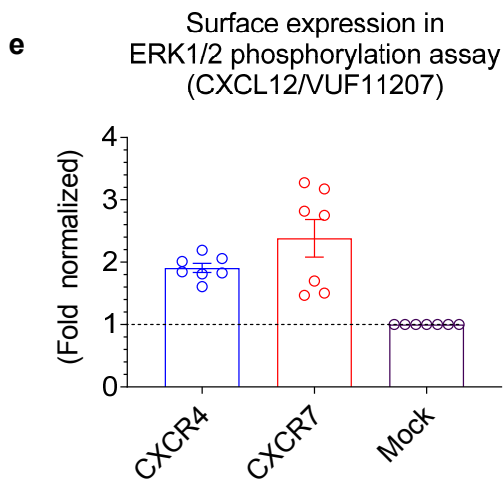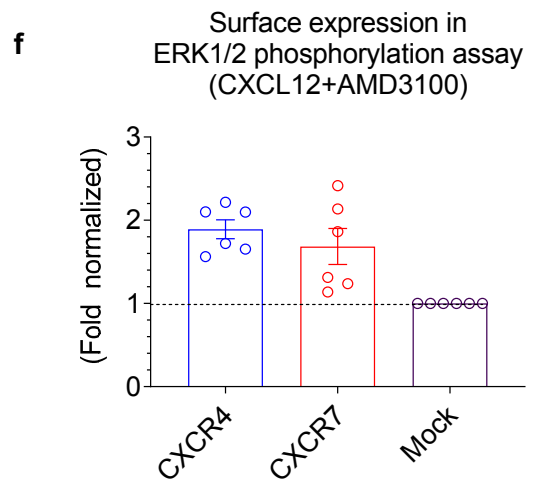

**Supplementary Fig. 6. Effect of AMD3100 and PTX treatment on ERK1/2 phosphorylation. a-d** CXCR4-induced ERK1/2 phosphorylation in HEK-239 cells transfected with either pcDNA (mock) or CXCR4 plasmid with and without pre-treatment of AMD3100 and PTX as indicated. Panels b and d present densitometry-based quantification of data presented in panels a and c (mean±SEM; n=6 and n=4 independent experiments, respectively; normalized with 5 min stimulation of CXCR4 condition without AMD3100/PTX; Two-way ANOVA, Tukey's multiple comparison test. The exact *p* values for panel b are as follows: mock-AMD3100: 0 min vs. mock-AMD3100: 5 min (*p* < 0.0001), mock-AMD3100: 5 min vs. mock+AMD3100: 5 min (*p* < 0.0001), mock+AMD3100: 0 min vs. mock+AMD3100: 5 min (*p* = 0.4441), CXCR4-AMD3100: 0 min vs. CXCR4-AMD3100: 5 min (*p* < 0.0001), CXCR4-AMD3100: 5 min vs. CXCR4+AMD3100: 5 min (*p* < 0.0001), CXCR4+AMD3100: 0 min vs. CXCR4+AMD3100: 5 min (*p* = 0.8975). The exact *p* values for panel d are as follows: mock-PTX: 0 min vs. mock-PTX: 5 min (*p* < 0.0001), mock-PTX: 5 min vs. mock+PTX: 5 min (*p* < 0.0001), mock+PTX: 0 min vs. mock+PTX: 5 min (*p* > 0.9999), CXCR4-PTX: 0 min vs. CXCR4-PTX: 5 min (*p* < 0.0001), CXCR4-PTX: 5 min vs. CXCR4+PTX: 5 min (*p* < 0.0001), CXCR4+PTX: 0 min vs. CXCR4+PTX: 5 min (*p* = 0.7397) (\*\*\*\**p* < 0.0001, ns= non-significant). **e-f** Surface expression of CXCR4 and CXCR7 in ERK1/2 phosphorylation assay was measured using whole cell ELISA (mean±SEM; n=7 independent experiments for panel e and n=6 independent experiments for panel f, normalized as fold-over mock (pcDNA)-transfection. Dotted line in the plots e and f indicates 1 fold. Source data are provided as a source data file.



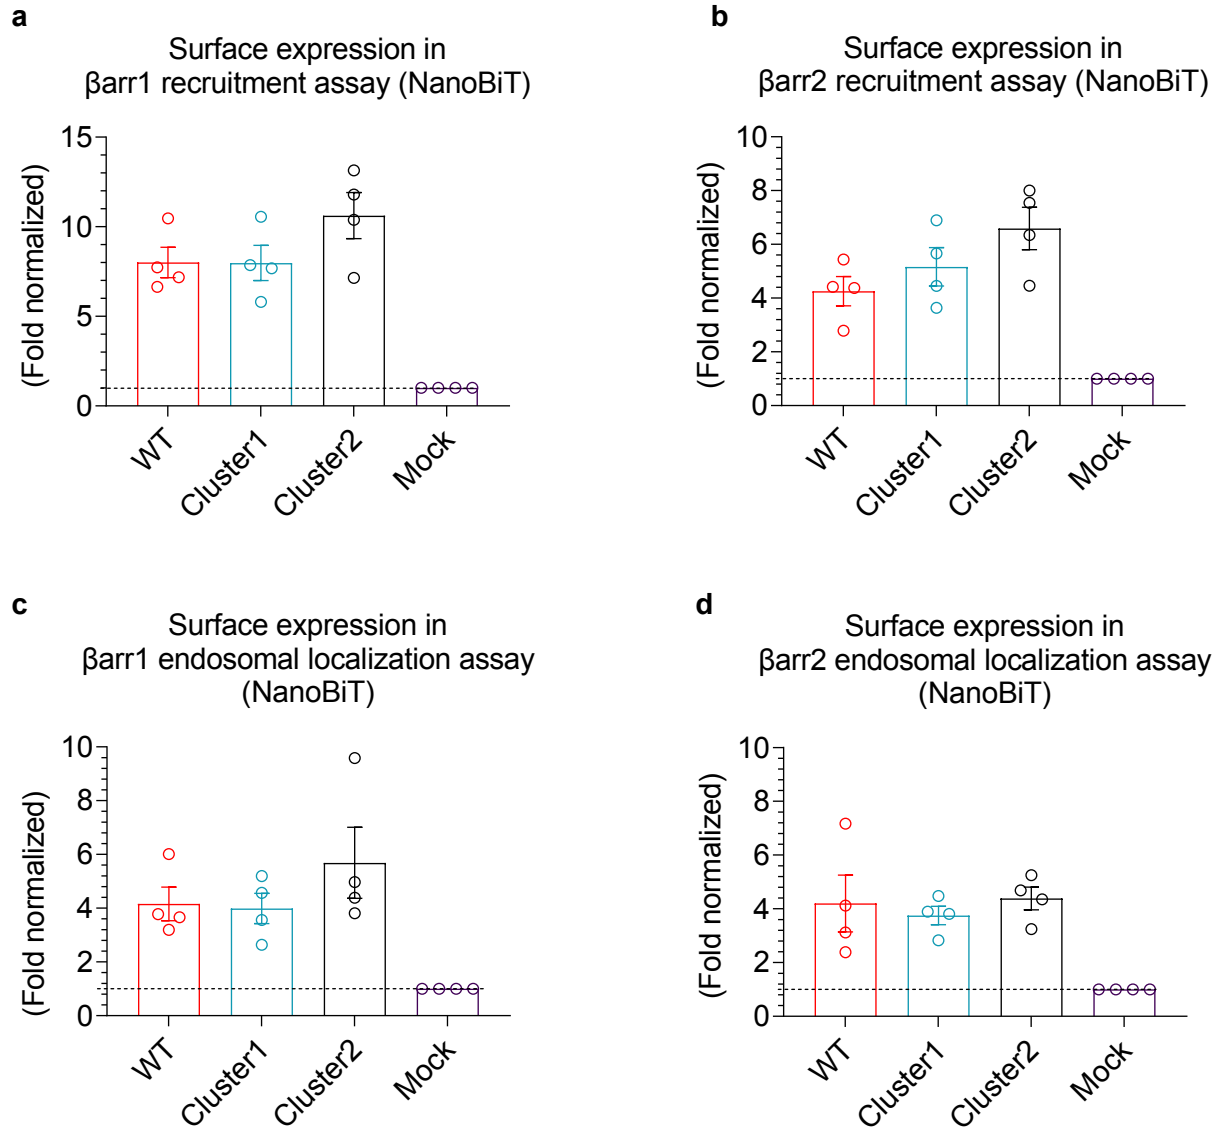

**Supplementary Fig. 7. Surface expression of CXCR7 mutants in different assays.** a-e Surface expression of indicated receptors was measured in different assays using whole cell ELISA (mean $\pm$ SEM; n=4 independent experiments; normalized as fold over mock (pcDNA)-transfection). Dotted line in the plots a, b, c, and d indicates 1 fold. Source data are provided as a source data file.

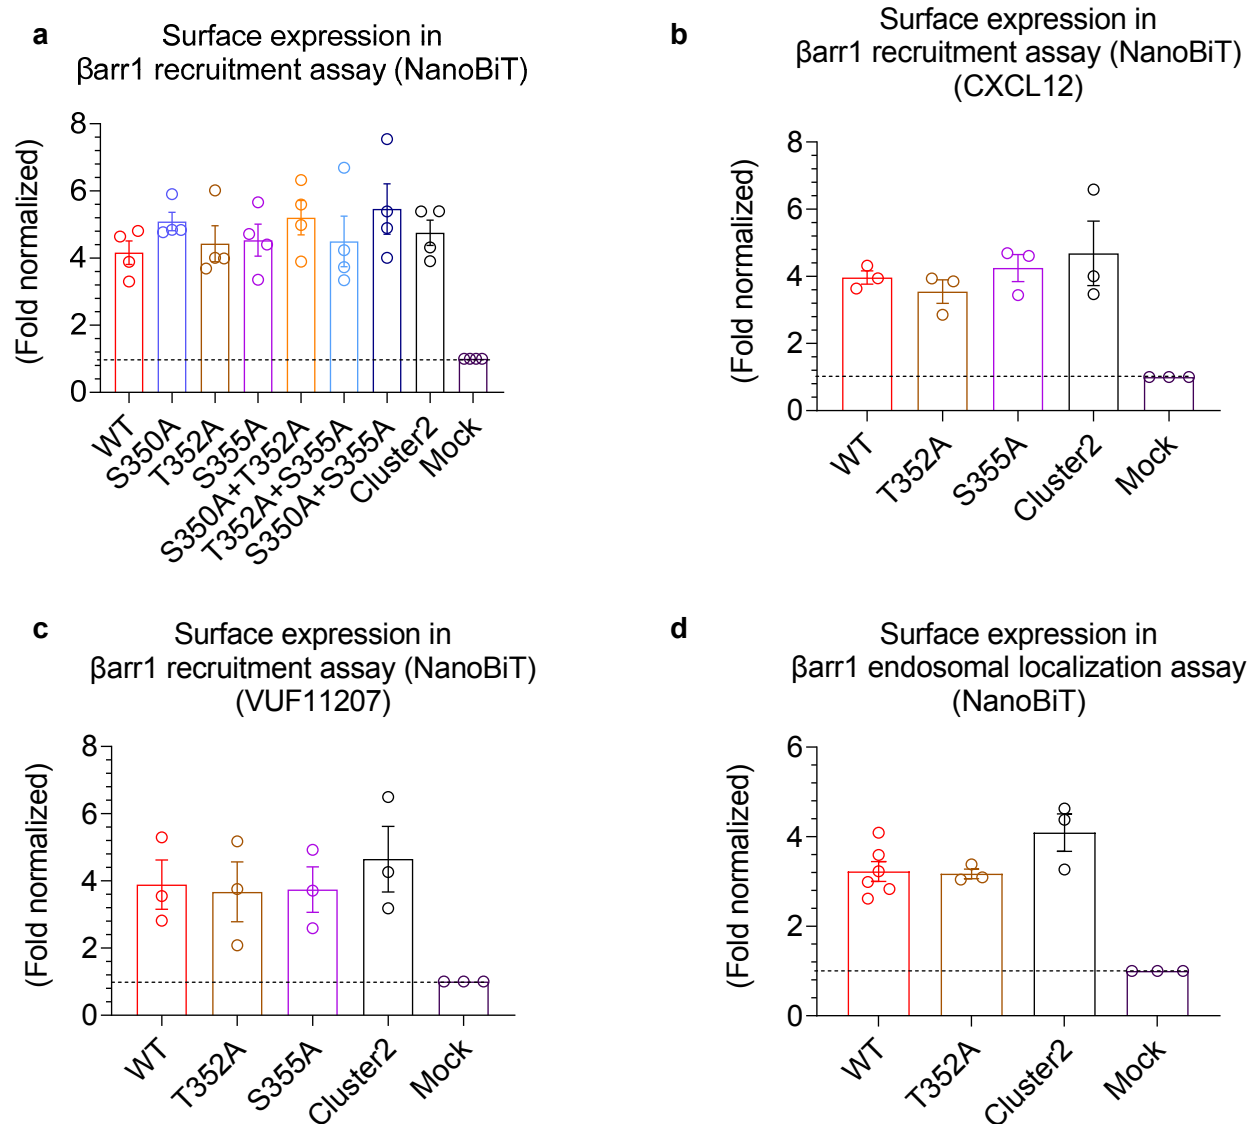

**Supplementary Fig. 8. Surface expression of CXCR7 mutants in different assays.** a-d Surface expression of indicated receptors were measured in different assays using whole cell ELISA (mean±SEM; n=4 independent experiments for panel a, n=3 independent experiments for panel b and c, n=3-6 independent experiments for panel d; for  $\beta$ arr1 endosomal localization: WT, n=6; T352A, n=3; and Cluster2, n=3 normalized as fold over mock (pcDNA)-transfection). Dotted line in the plots a, b, c, and d indicates 1 fold. Source data are provided as a source data file.

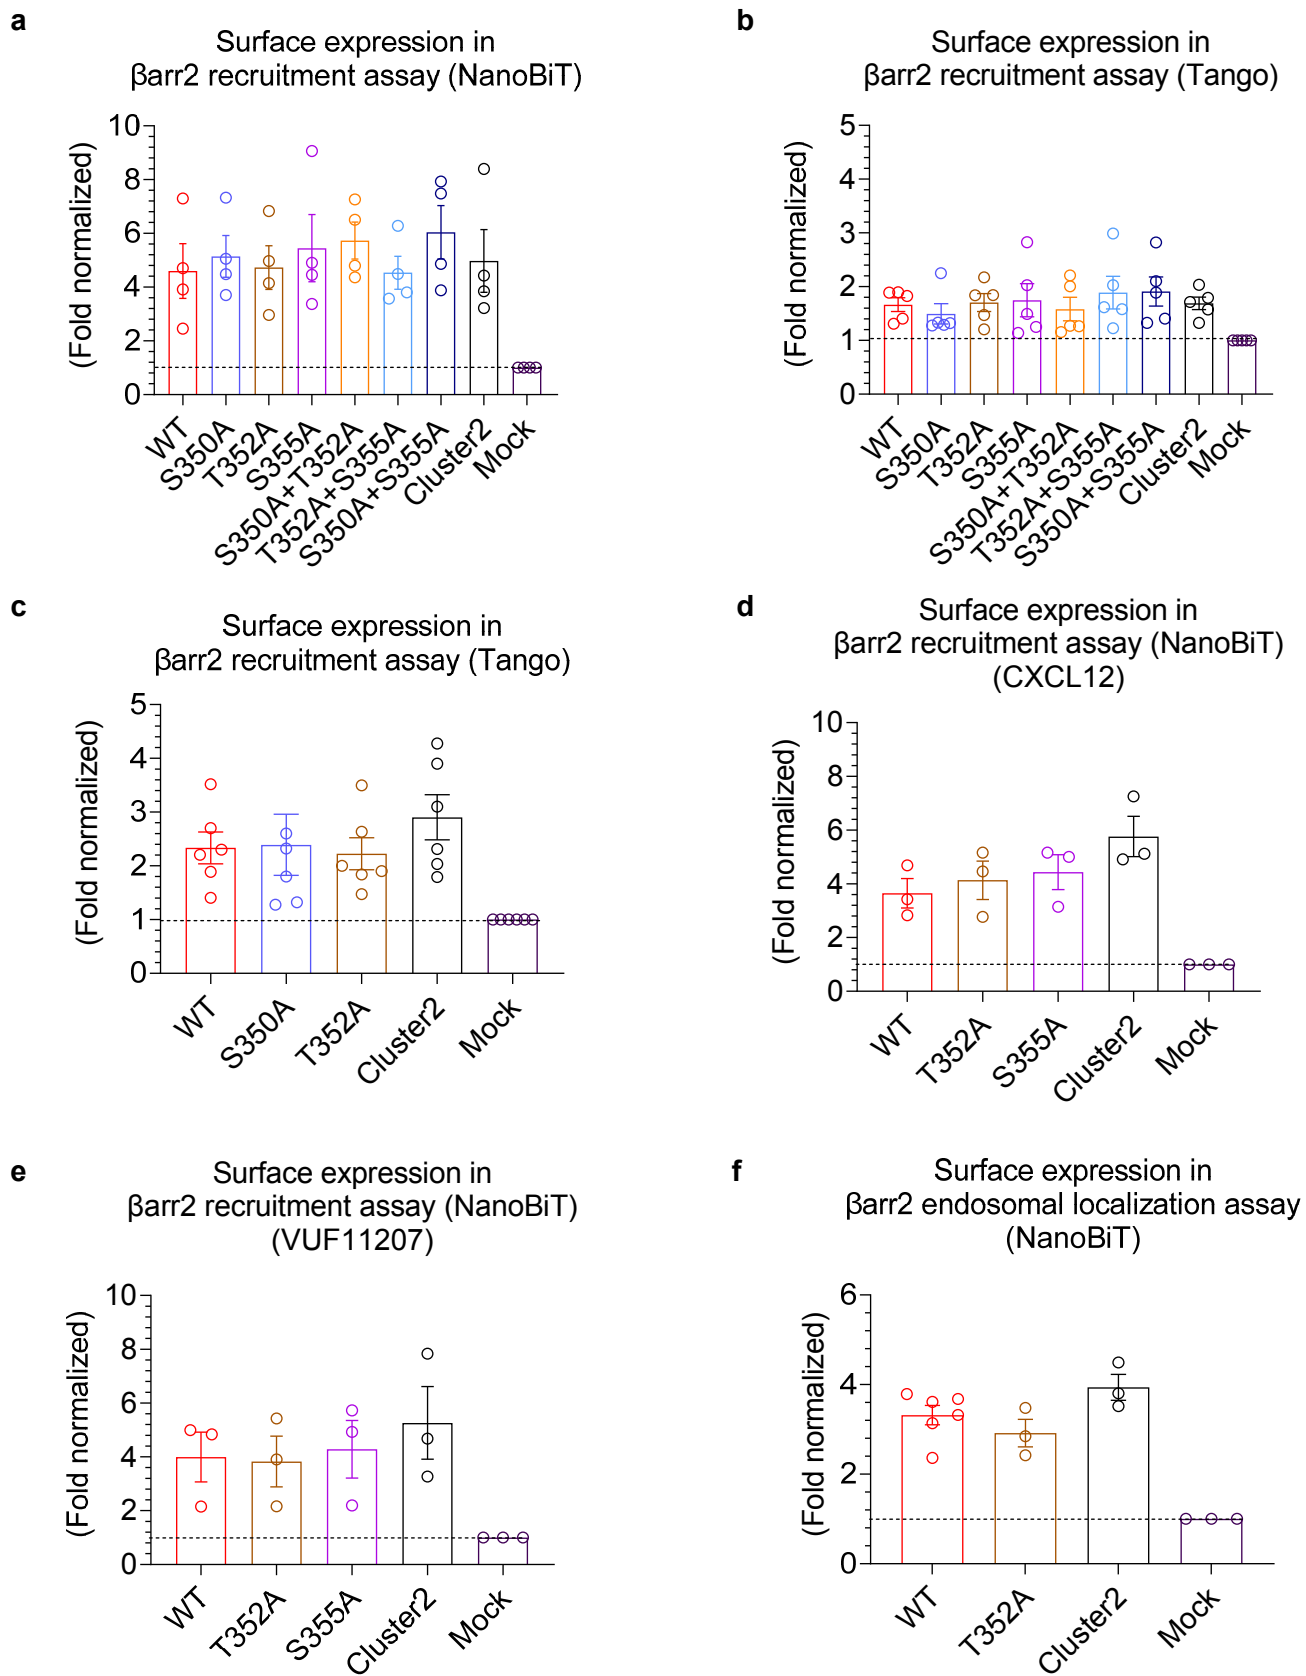

**Supplementary Fig. 9. Surface expression of CXCR7 mutants in different assays.** a-f Surface expression of indicated receptors were measured in different assays using whole cell ELISA (mean $\pm$ SEM; n=4 independent experiments for panel a, n=5 for panel b, n=6 for panel c, n=3 for panel d and e, n=3-6 for panel f;  $\beta$ arr2 endosomal localization: WT, n=6; T352A, n=3; and Cluster2, n=3; normalized as fold over mock (pcDNA)-transfection). Dotted line in the plots a,b,c,d, and e indicates 1 fold. Source data are provided as a source data file.

**Supplementary Table 1. List of the primers used in the study.**

| <b>Construct</b>   | <b>Primer</b>        | <b>Sequence</b>                 |
|--------------------|----------------------|---------------------------------|
| CXCR1 Tango        | CXCR1_Fw             | CGCGGATCC ATGTCCAATATCACCG      |
|                    | CXCR1_Rv             | CCGGAATTC CAAATTTGAAGAGACATTAAC |
| CXCR2 Tango        | CXCR2_Fw             | CGCGGATCCATGGAGGACTTCAACATGGAG  |
|                    | CXCR2_Rv             | CCGGAATTCAGGGTCTGGAGGTG         |
| CXCR3 Tango        | CXCR3_Fw             | CGCGGATCCATGGTTCTGGAAGTTTCC     |
|                    | CXCR3_Rv             | CCGGAATTCGAGGCCAGAATAACTAGC     |
| CXCR4 Tango        | CXCR4_Fw             | CGCGGATCCATGGAGGGGATATCAATC     |
|                    | CXCR4_Rv             | CCGGAATTCAGAGCTATGAAATGAGCTG    |
| CXCR5 Tango        | CXCR5_Fw             | CGCGGATCCATGAACTATCCCCTGACC     |
|                    | CXCR5_Rv             | CCGGAATTCAAAGGTGGTCAGGCTAG      |
| CXCR6 Tango        | CXCR6_Fw             | CGCGGATCCATGGCCGAACACGAC        |
|                    | CXCR6_Rv             | CCGGAATTCAGCTGGAACATGGAGG       |
| CXCR7(S350A)       | CXCR7_S350A_Fw       | CTCCAGAGTCGCCGAGACGGAGTAC       |
|                    | CXCR7_S350A_Rv       | GCATCGATGAGCTTGGTG              |
| CXCR7(T352A)       | CXCR7_T352A_Fw       | AGTCTCAGAGGCCGAGTACTCTGCC       |
|                    | CXCR7_T352A_Rv       | CTGGAGGCATCGATGAGC              |
| CXCR7(S355A)       | CXCR7_T355A_Fw       | GACGGAGTACGCCGCTTGGAGC          |
|                    | CXCR7_T355A_Rv       | TCTGAGACTCTGGAGGCAT             |
| CXCR7(S350A+T352A) | CXCR7_S350A+T352A_Fw | AGTCGCCGAGGCCGAGTACTCTG         |
|                    | CXCR7_S350A+T352A_Rv | CTGGAGGCATCGATGAGC              |
| CXCR7(T352A+S355A) | CXCR7_T352A+S355A_Fw | GGCCGAGTACGCCGCTTGGAGC          |
|                    | CXCR7_T352A+S355A_Rv | TCTGAGACTCTGGAGGCATC            |
| CXCR7(S350A+S355A) | CXCR7_S350A+S355A_Fw | GACGGAGTACGCCGCTTGGAGCAG        |
|                    | CXCR7_S350A+S355A_Rv | TCGGCGACTCTGGAGGCA              |
| CXCR7_Cluster1     | CXCR7_Cluster1_Fw    | AGGGCTCGCCAAGCTCATCGATGCCTCC    |
|                    | CXCR7_Cluster1_Rv    | GCTTTGGCCGCTACTTGAAGATGAAGGCC   |
| CXCR7_Cluster2     | CXCR7_Cluster2_Fw    | GAGTACGCTGCCTTGGAGCAGAGCACC     |
|                    | CXCR7_Cluster2_Rv    | CGCCTCTGCGACTCTGGAGGCATCGATG    |
| CXCR7_cSmBiT       | CXCR7_cSmBiT_Fw      | CGGGGTACCGAGGAGATCTGCCACCATGGGC |
|                    | CXCR7_cSmBiT_Rv      | TCCCCGGGTTTGGTGCTCTGCTCCAAG     |
| CXCR4_cSmBiT       | CXCR4_cSmBiT_Fw      | CGGGGTACCGAGGAGATCTGCCACCATGGGC |
|                    | CXCR4_cSmBiT_Rv      | TCCCCGGGAGAGCTATGAAATGAGCTGG    |
| CXCR4_LgBiT        | CXCR4_LgBiT_Fw       | CGGGGTACCGAGGAGATCTGCCACCATGGGC |
|                    | CXCR7_LgBiT_Rv       | TCCCCGGGAGAGCTATGAAATGAGCTGG    |

Source Data file :Supplementary Fig. 6a

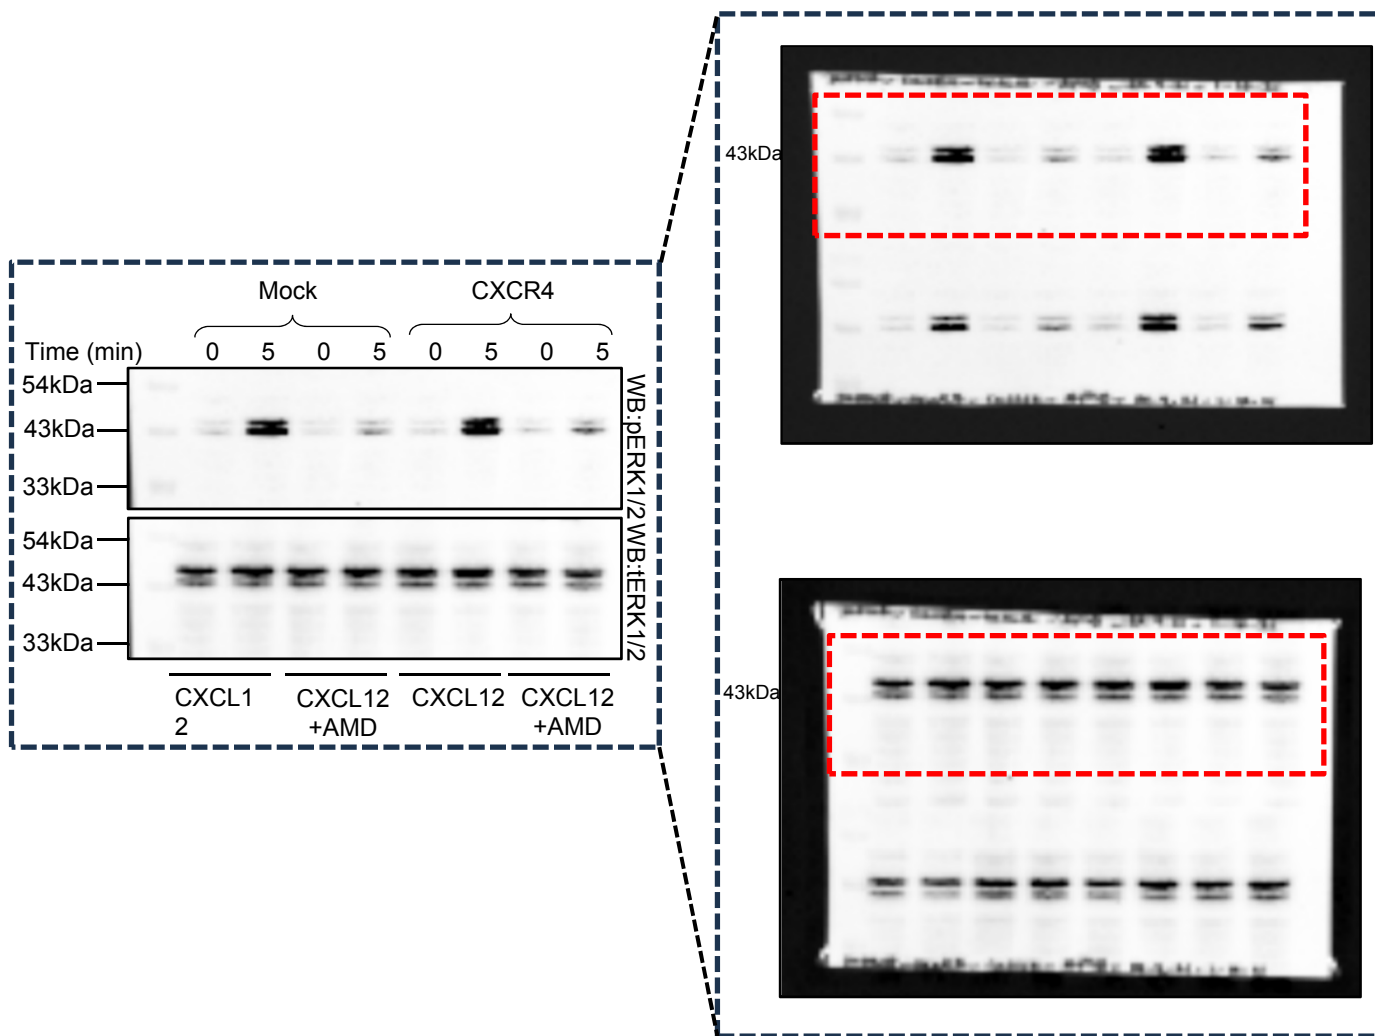

Source Data file :Supplementary Fig. 6c

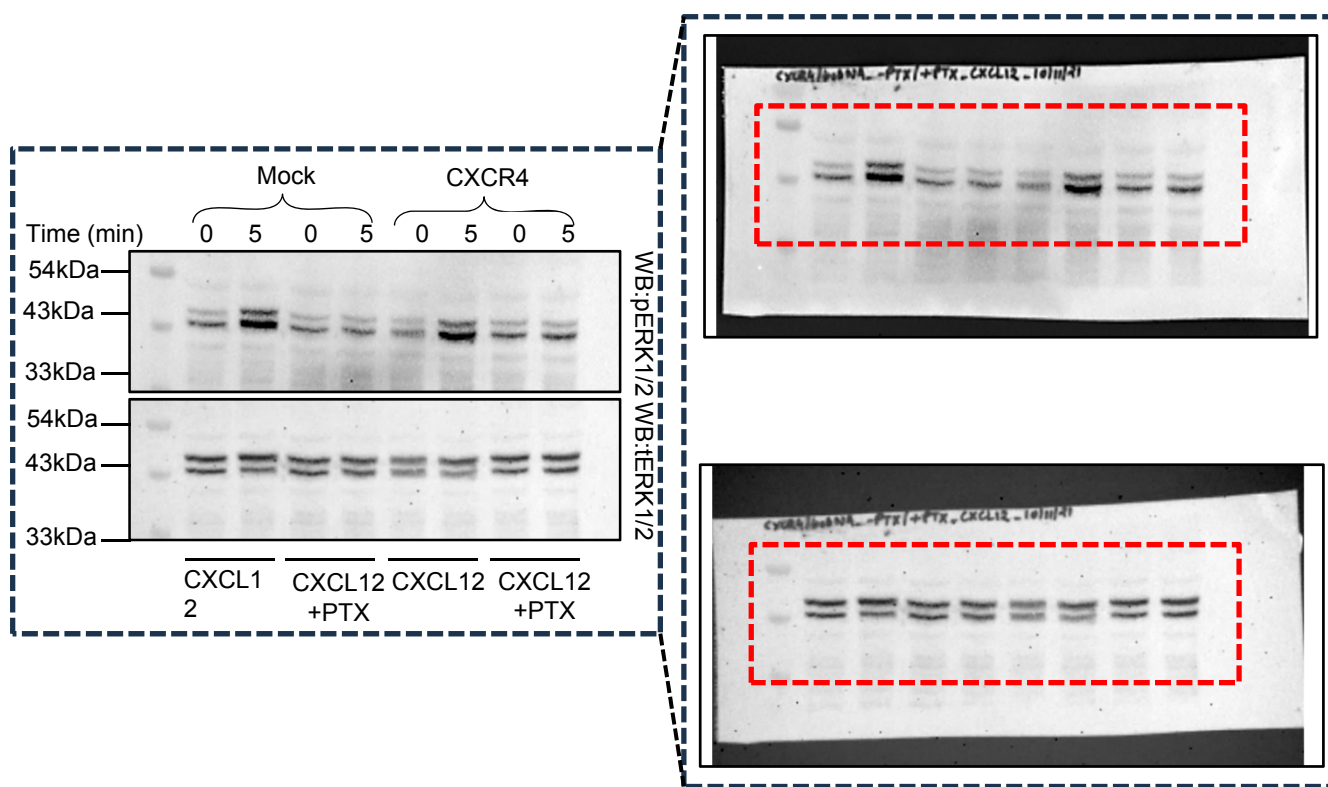

Supplement: 41467_2023_40482_MOESM1_ESM.pdf [file 41467_2023_40482_MOESM1_ESM.pdf]
